# Supplementary material
Source: PubMed Central journal article supplement (PMC6891851)
Supplement: oc9b00501_si_003.pdf [file oc9b00501_si_003.pdf]

**Video S1.** 2x stocks are made for peptide (dissolved in water) and protein (in 2x HBS buffer), and then chilled on ice. After mixing, the sample is then heated at 37 °C to initiate gelation. No free-flowing solution is present after the gel is formed, indicating that all of the protein is encapsulated within the gel.
